# Supplementary material
Source: bioRxiv or medRxiv preprint supplement (https://www.biorxiv.org/highwire/filestream/6027/field_highwire_adjunct_files/2/022889-11.pdf)
Supplement: Supplementary file [file 022889-11.pdf]

**Additional File 11 Population divergence time estimated on a subset of SNPs chosen to exclude the effect of an archaic introgression from Denisovan.**

| TIME              | South_Africa  |                |                | East_Africa   |                |                | West_Africa    |                |                |
|-------------------|---------------|----------------|----------------|---------------|----------------|----------------|----------------|----------------|----------------|
|                   | 0.05          | 0.50           | 0.95           | 0.05          | 0.50           | 0.95           | 0.05           | 0.50           | 0.95           |
| Europe            | 67,080        | 74,835         | 82,158         | 63,365        | 69,990         | 76,924         | 74,397         | 81,638         | 88,935         |
| Caucasus          | 68,157        | 75,091         | 81,375         | 62,465        | 68,254         | 74,136         | 74,978         | 81,420         | 87,684         |
| West_Asia         | 66,751        | 73,829         | 81,501         | 60,728        | 66,614         | 73,575         | 73,378         | 80,013         | 87,664         |
| Central_Asia      | 71,165        | 76,871         | 85,308         | 66,334        | 71,201         | 79,020         | 78,516         | 83,764         | 92,176         |
| North_India       | 73,170        | 78,328         | 86,503         | 66,226        | 70,545         | 77,943         | 79,439         | 84,153         | 92,258         |
| South_India       | 65,513        | 69,948         | 76,727         | 60,831        | 64,615         | 70,959         | 72,374         | 76,414         | 83,202         |
| East_Asia         | 83,335        | 90,024         | 98,585         | 81,812        | 87,813         | 96,292         | 91,761         | 97,885         | 106,410        |
| South_Asia        | 78,051        | 85,275         | 93,717         | 74,613        | 80,916         | 89,013         | 85,905         | 92,591         | 100,996        |
| Malaysia          | 69,262        | 74,742         | 83,683         | 67,069        | 71,844         | 80,363         | 76,771         | 81,646         | 90,418         |
| Borneo            | 77,392        | 82,485         | 90,835         | 75,769        | 80,324         | 88,529         | 85,708         | 90,274         | 98,587         |
| Sumatra           | 78,058        | 85,065         | 94,003         | 76,230        | 82,418         | 91,122         | 86,230         | 92,600         | 101,427        |
| East_Indonesia    | 69,173        | 74,649         | 82,962         | 66,995        | 71,783         | 79,768         | 76,958         | 81,884         | 90,111         |
| Philippine        | 75,957        | 81,850         | 90,794         | 74,435        | 79,658         | 88,371         | 84,170         | 89,457         | 98,290         |
| Moluccas          | 68,332        | 74,043         | 82,212         | 66,836        | 71,847         | 79,773         | 76,225         | 81,340         | 89,398         |
| <b>Australia</b>  | <b>88,148</b> | <b>97,961</b>  | <b>109,856</b> | <b>87,869</b> | <b>96,644</b>  | <b>108,264</b> | <b>96,704</b>  | <b>105,609</b> | <b>117,190</b> |
| <b>New_Guinea</b> | <b>98,404</b> | <b>106,468</b> | <b>118,818</b> | <b>99,944</b> | <b>107,302</b> | <b>119,679</b> | <b>105,518</b> | <b>112,466</b> | <b>124,180</b> |
| Fiji              | 72,312        | 79,003         | 86,000         | 71,636        | 77,580         | 84,639         | 80,484         | 86,531         | 93,454         |
| Polynesia         | 71,180        | 77,628         | 86,677         | 71,972        | 77,768         | 86,774         | 79,621         | 85,362         | 94,228         |
| Onge              | 76,202        | 82,147         | 90,699         | 77,532        | 82,881         | 91,576         | 85,091         | 90,206         | 98,508         |
| Jehai             | 66,938        | 72,742         | 81,361         | 66,638        | 71,763         | 80,192         | 75,167         | 80,300         | 88,745         |
| Mamanwa           | 67,928        | 73,660         | 83,429         | 68,034        | 73,129         | 82,624         | 76,254         | 81,310         | 90,864         |
